# Supplementary material
Source: Springer Nature journal article supplement (https://www.springermedizin.de/resource/supplementary/12889_2010_2551_MOESM2_ESM.pdf/9486420)
Supplement: MOESM2 [file 9486420]

Murcia Cardiovascular  
Risk Factors Survey  
(1992)  
**N = 3089**

Subjects who refused to provide a blood sample or to undergo  
a physical examination (**N = 669**)

Subjects with missing data on biochemical variables, blood  
pressure, or anthropometrical variables (**N = 106**)

Study cohort  
**N = 2314**

Lost to follow-up  
**N = 291**

Sample available for  
analysis  
**N = 2023**

ISCHEMIC HEART DISEASE

Unspecified  
angina  
**N = 34**

Definite AMI:  
**N = 34**  
Possible AMI:  
**N = 3**

CEREBROVASCULAR  
DISEASE

Ischemic stroke: **N = 24**  
Hemorrhagic stroke: **N = 5**  
TIA: **N = 2**  
Unspecified: **N = 6**

ALL CARDIOVASCULAR EVENTS  
**N = 81**
